# Supplementary material
Source: PubMed Central journal article supplement (PMC1783378)
Supplement: pnas_0610471104_1.pdf [file pnas_0610471104_1.pdf]

Generate initial population  $P_0$  of size  $N$  using Latin hypercube sampling

Rank and sort  $P_0$  based on non-domination level

Create offspring population  $Q_0$  using  $k$  different algorithms. Each algorithm creates  $(N/k)$  points

Set  $t = 0$ , and  $T =$  maximum number of generations

**while**  $t < T$  **do**

$$R_t = P_t \cup Q_t$$

Partition  $R_t$  into different fronts  $F_1, F_2, \dots$

Set  $P_{t+1} = \emptyset$  and  $i = 1$

**while**  $|P_{t+1}| < N$  **do**

Calculate crowding distance in  $F_i$

**if**  $|F_i| + |P_{t+1}| = N$  **then**

$$P_{t+1} = P_{t+1} \cup F_i$$

**else**

**if**  $|F_i| + |P_{t+1}| \leq N$  **then**

Sort  $F_i$  members in order of decreasing crowding distance

$$P_{t+1} = P_{t+1} + \text{the first } (N - |P_{t+1}|) \text{ elements of } F_i$$

**end if**

**end if**

$$i = i + 1$$

**end while**

Calculate crowded comparison operator  $\forall i \in P_{t+1}$

Calculate the number of offspring points,  $P_{t+1}^k$  each of the  $k$  algorithms contributed to  $P_{t+1}$

Set  $j = 1$

**while**  $j \leq k$  **do**

$$\text{For adaptive offspring creation, calculate } N_{t+1}^j = N \cdot (P_{t+1}^j / N_t^j) / \sum_{w=1}^k (P_{t+1}^w / N_t^w)$$

$$j = j + 1$$

**end**

Create  $Q_{t+1}$  by generating  $N_{t+1}^k$  offspring points with each of the  $k$  individual algorithms

$$t = t + 1$$

**end while**
